# Supplementary material
Source: PubMed Central journal article supplement (PMC5836747)
Supplement: NIHMS945542-supplement-supplement_1.pdf [file NIHMS945542-supplement-supplement_1.pdf]

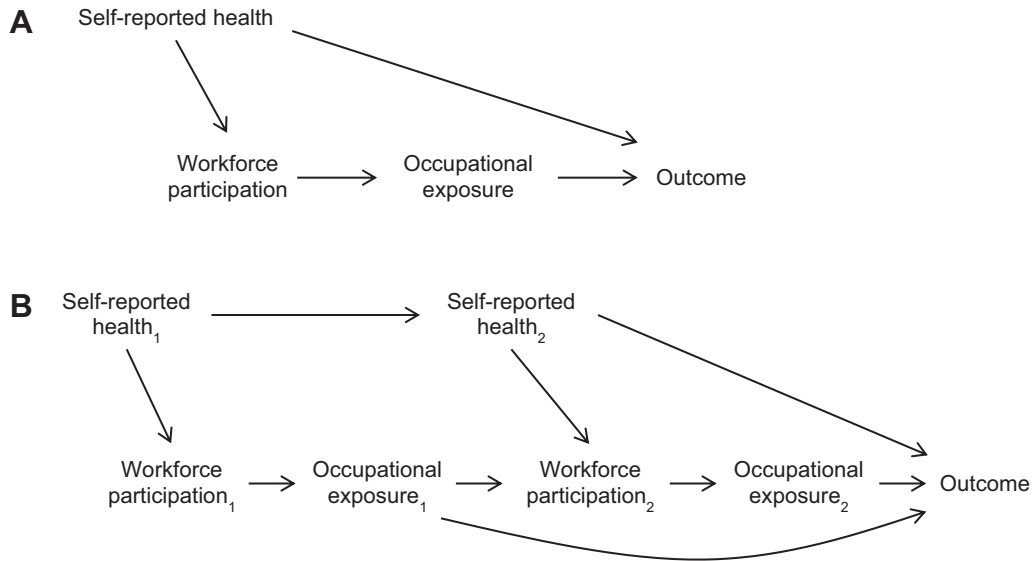

**Fig. A1.** Directed acyclic graphs illustrating assumed structures of healthy worker biases in the study population. We assume that self-reported health affects both the likelihood of workforce participation (and subsequently, the likelihood of occupational exposure) and the risk for the outcome. In panel A, variables are time invariant; in panel B, they are time varying (two time points are illustrated), with occupational exposures at both time points of interest as causes of the outcome.

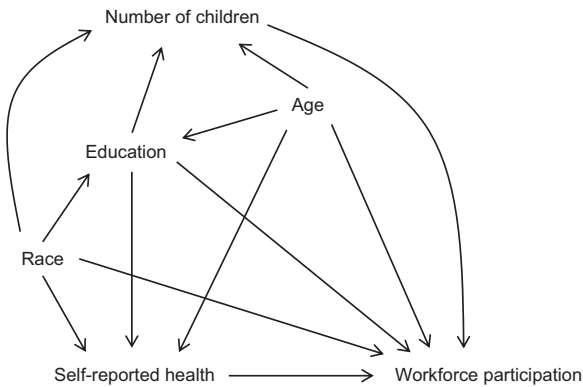

**Fig. A2.** Directed acyclic graph illustrating assumed relationships between the five variables of interest. For the association between self-reported health and workforce participation, open backdoor paths can be closed by conditioning on age, education, and race.

**Table A1**  
Unweighted sample size for the analyses and weighted frequencies of workforce nonparticipation among women and men, by number of children aged less than 18 years in the home—Gallup-Healthways Well-Being Index, 2013–2015

| Self-reported health | 0 Children |                    | 1 Child |                    | 2 Children |                    | 3 Children |                    | 4 Children |                    |
|----------------------|------------|--------------------|---------|--------------------|------------|--------------------|------------|--------------------|------------|--------------------|
|                      | No.        | % Out of workforce | No.     | % Out of workforce | No.        | % Out of workforce | No.        | % Out of workforce | No.        | % Out of workforce |
| Women                | 19,104     |                    | 11,209  |                    | 13,248     |                    | 6303       |                    | 3657       |                    |
| Excellent            | 4499       | 10                 | 2436    | 15                 | 3181       | 20                 | 1506       | 26                 | 834        | 37                 |
| Very good            | 6742       | 10                 | 3630    | 15                 | 4467       | 20                 | 1977       | 25                 | 1096       | 30                 |
| Good                 | 5224       | 15                 | 3346    | 21                 | 3702       | 25                 | 1860       | 32                 | 1082       | 38                 |
| Fair                 | 2025       | 29                 | 1452    | 31                 | 1556       | 34                 | 795        | 41                 | 541        | 46                 |
| Poor                 | 614        | 58                 | 345     | 63                 | 342        | 54                 | 165        | 51                 | 104        | 50                 |
| Men                  | 32,640     |                    | 11,483  |                    | 13,674     |                    | 6178       |                    | 3432       |                    |
| Excellent            | 8032       | 8                  | 2556    | 5                  | 3036       | 4                  | 1372       | 5                  | 765        | 5                  |
| Very good            | 10,838     | 8                  | 3759    | 5                  | 4774       | 4                  | 2014       | 4                  | 1000       | 5                  |
| Good                 | 9392       | 10                 | 3658    | 7                  | 4251       | 7                  | 1903       | 7                  | 1029       | 8                  |
| Fair                 | 3620       | 19                 | 1272    | 13                 | 1374       | 13                 | 744        | 15                 | 525        | 11                 |
| Poor                 | 758        | 41                 | 238     | 33                 | 239        | 33                 | 145        | 39                 | 113        | 31                 |
